# Supplementary material
Source: PubMed Central journal article supplement (PMC4159188)
Supplement: NIHMS577373-supplement-Supporting_Information.pdf [file NIHMS577373-supplement-Supporting_Information.pdf]

DOI: 10.1002/adfm.201202215.

**Matrix Metalloproteinase Responsive, Proximity-activated Polymeric Nanoparticles for siRNA Delivery**

By *Hongmei Li, Shann S. Yu, Martina Miteva, Christopher E. Nelson, Thomas Werfel, Todd D.*

*Giorgio\*, Craig L. Duvall\**

Supporting Information

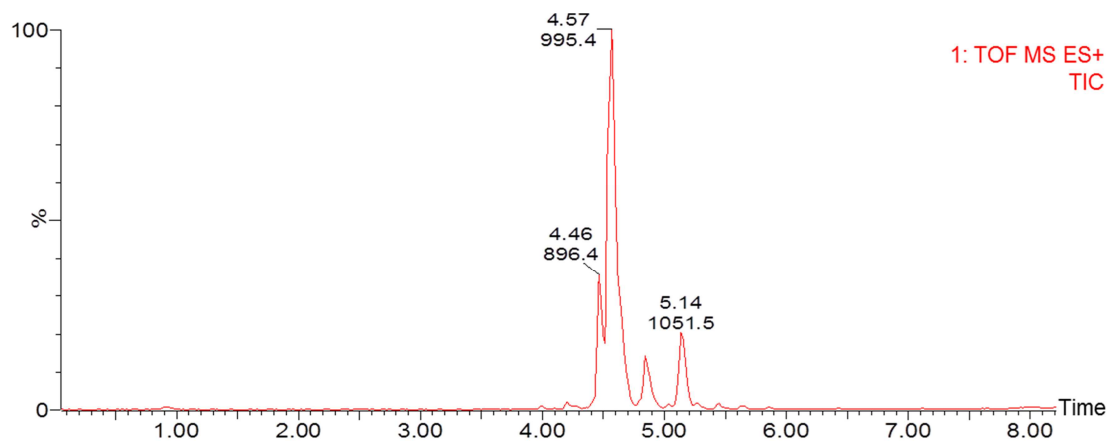

**Figure S1.** LC-MS analysis of the crude peptide prepared by solid phase peptide synthesis. The major peak at 4.57 min elution time (MW = 995.4 Da) is consistent with the estimated product molecular weight of 995 Da.

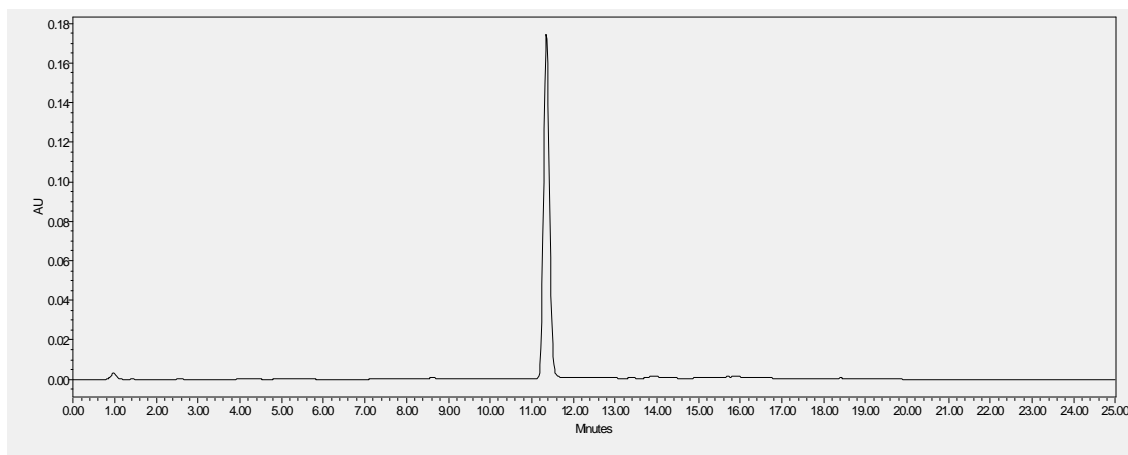

**Figure S2.** HPLC analysis of the purified peptide with reverse phase C18 column. Chromatography was monitored with UV-vis detector at 280 nm.

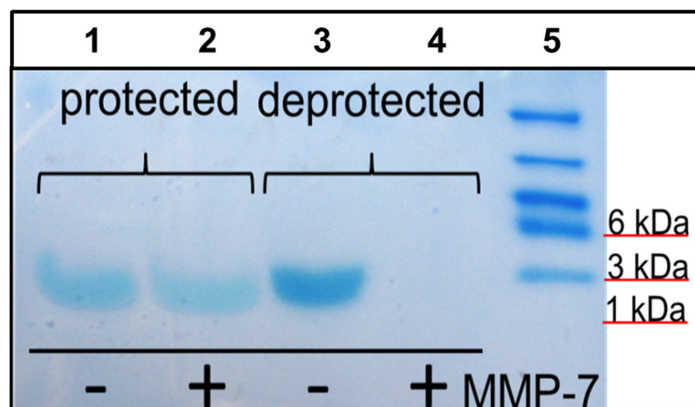

**Figure S3.** MMP-7 dependent cleavage of VPLSLYSGCG peptide. *t*-butyl protecting groups on amino acid side chains of the peptide (protected, lanes 1 and 2) inhibit MMP-7 proteolysis. Deprotected peptide was MMP-7 sensitive (lane 4), qualitatively confirmed by the absence of a band at the peptide MW relative to untreated control (lane 3).

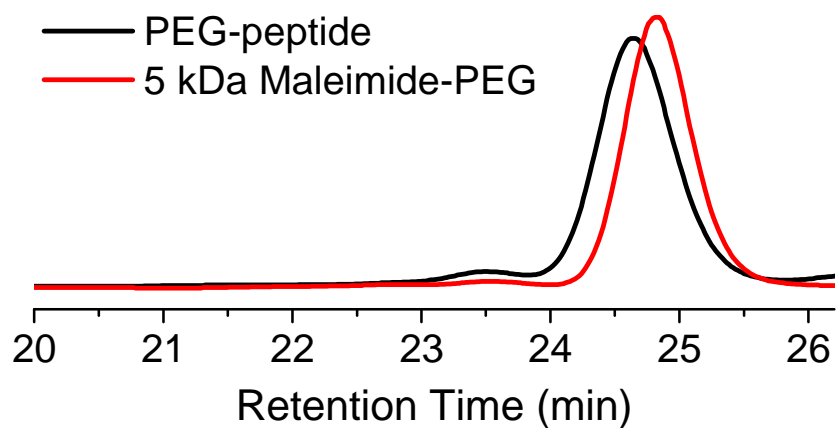

**Figure S4.** GPC confirmation of the 5 kDa maleimide end-functionalized PEG conjugation with the VPLSLYSGCG peptide.

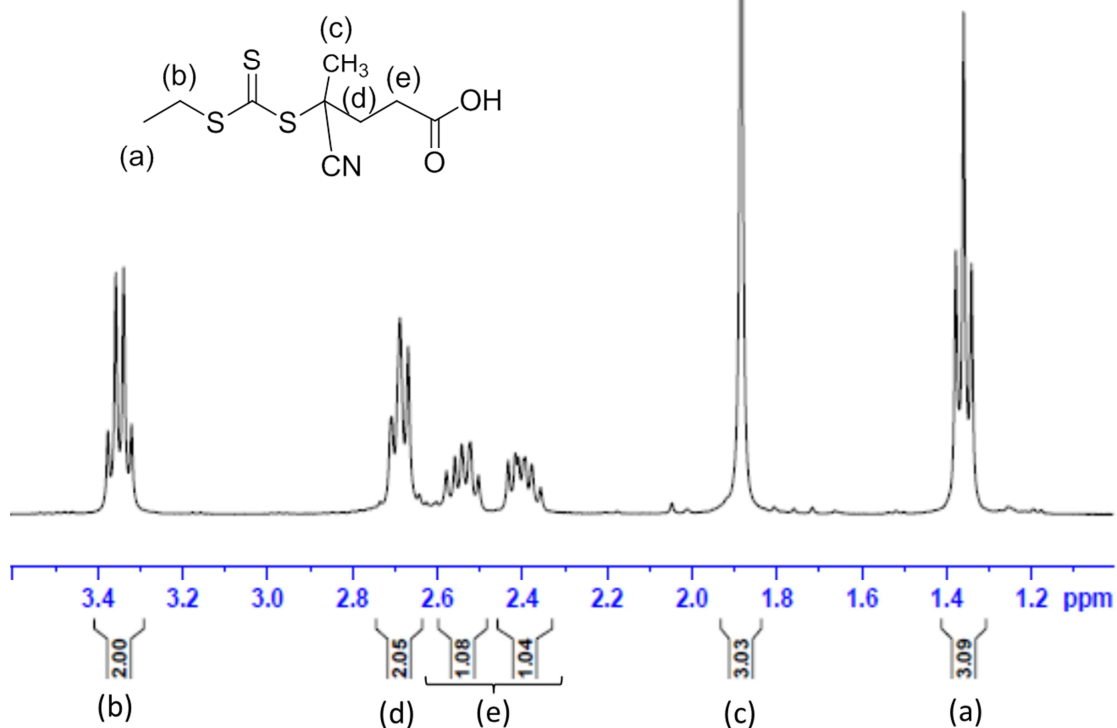

**Figure S5.** <sup>1</sup>H-NMR spectrum of the RAFT chain transfer agent, 4-cyano-4-(ethylsulfanylthio-carbonyl) sulfanylpentanoic acid (ECT) in CDCl<sub>3</sub>.

Submitted to

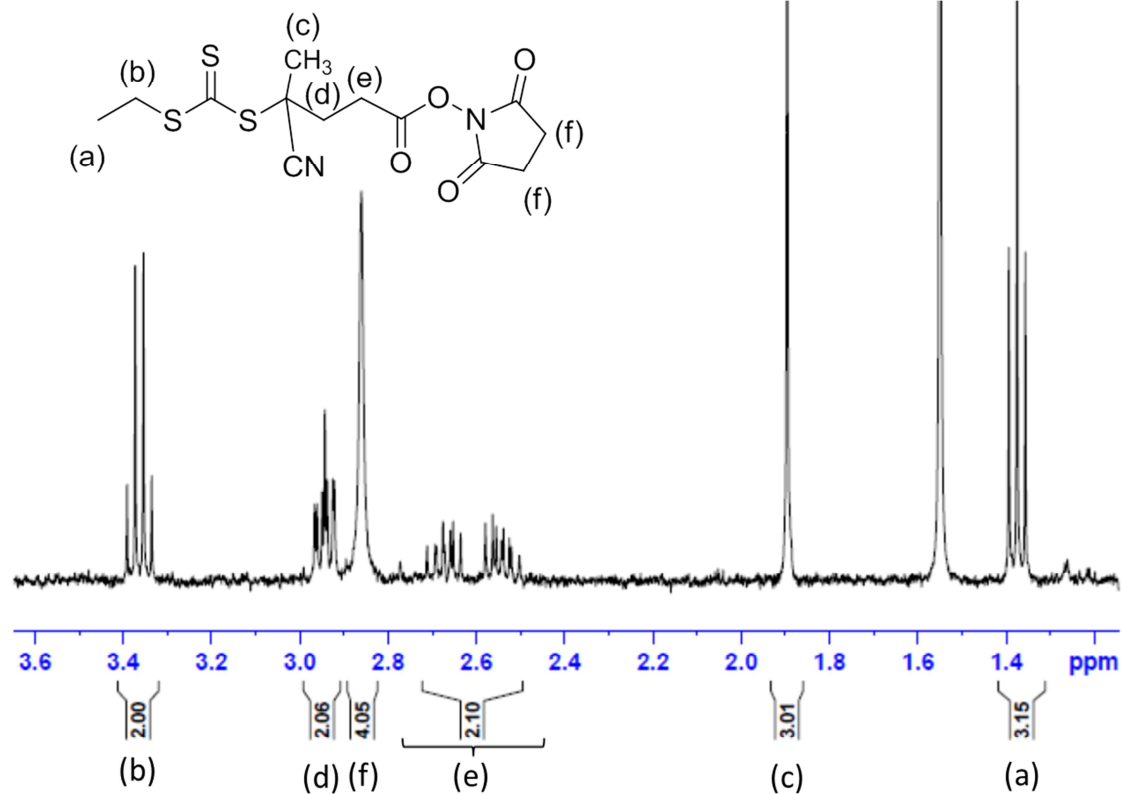

**Figure S6.** <sup>1</sup>H-NMR spectrum of the succinimide-functionalized ECT (NHS-ECT) in MeOH-*d*<sub>4</sub>.

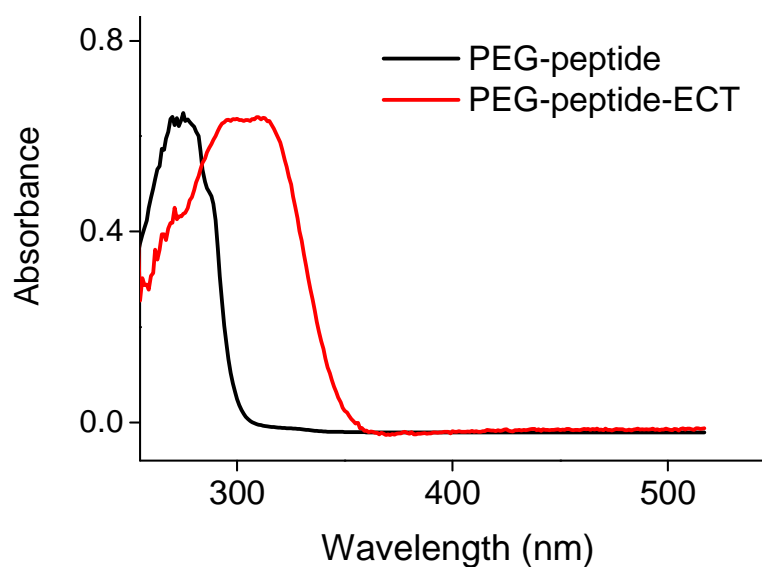

**Figure S7.** UV-vis spectroscopy characterization of the purified ECT functionalized PEG-peptide.

The optical absorbance at 320 nm is consistent with conjugation of ECT onto PEG-peptide.

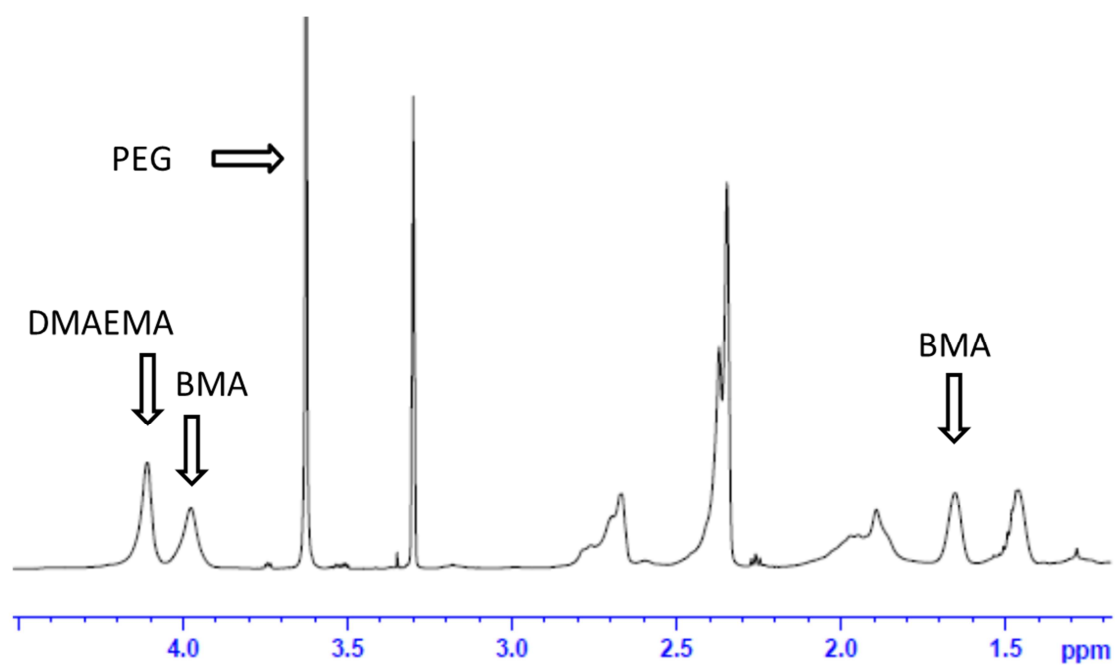

**Figure S8.**  $^1\text{H-NMR}$  spectrum of PEG-pep-pD-pDPB in  $\text{MeOH-}d_4$ .



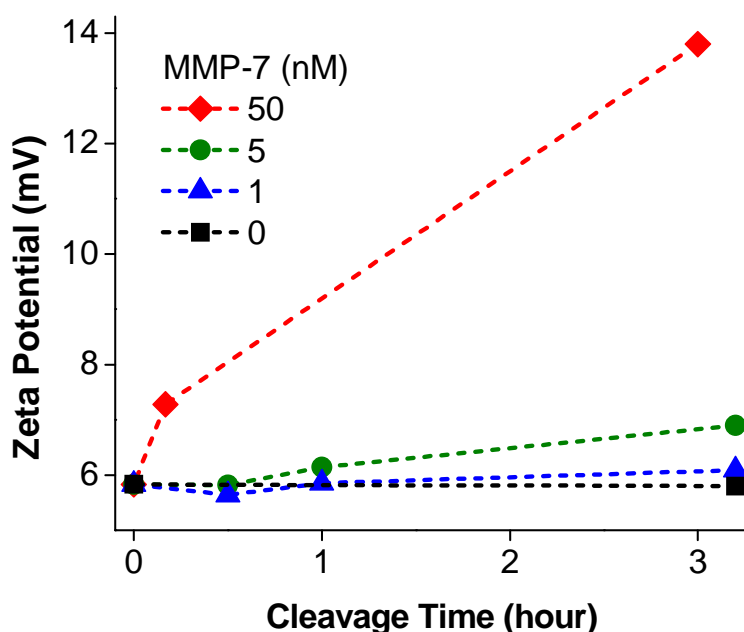

**Figure S9.** MMP-7 concentration dependent physicochemical switch activity in PAT-SPNs (0, 1, 5, and 50 nM MMP-7). Nanocarrier  $\zeta$ -potential increased from +5.83 to +13.8 mV over 3 h of treatment with a metastasis-relevant MMP-7 concentration (50 nM, red) but not under MMP-7 levels corresponding to normal tissues (blue and green) in the presence of 50  $\mu\text{M}$  of  $\text{Zn}^{2+}$ .  $\zeta$ -potential after 3 h treatment of MMP-7 at 5 nM concentration increased from +5.83 to +6.90 mV (green) and from +5.83 to +6.09 mV at 1 nM concentration (blue). No addition of MMP-7, but with 50  $\mu\text{M}$  of  $\text{Zn}^{2+}$ , is reported here as 0 nM MMP.

Submitted to

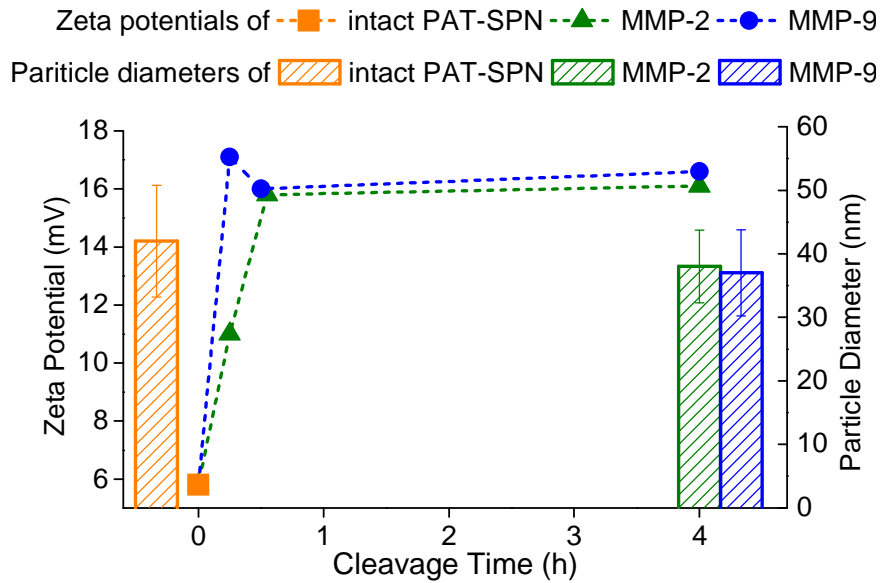

**Figure S10.** Responsiveness of PAT-SPNs to MMP-2 and MMP-9. Following treatment with 50 nM MMP-2, PAT-SPN zeta potential increased from +5.8 to +15.8 mV (green line) and particle diameter decreased by 4 nm (green column). Following treatment with 50 nM MMP-9, zeta potential increased to +16.0 mV (blue line) and particle diameter decreased by 5 nm (blue column). The zeta potential responses were rapid, occurring in less than 0.5 h of treatment. These changes are consistent with proteolytic cleavage of the VPLSLYSG and the subsequent shedding of the PEG corona.

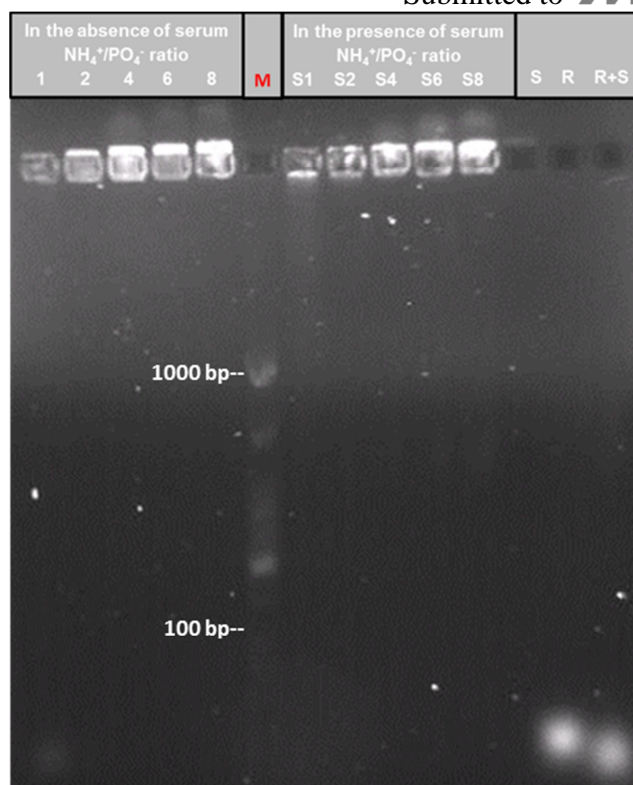

**Figure S11.** Serum stability of siRNA loaded into PAT-SPN was assessed using agarose gel electrophoresis. siRNA was combined with PAT-SPN with N(+)/P(-) charge ratios of 1/1, 2/1, 4/1, and 8/1. Samples were mixed with no (left side) or with (middle) 40% serum. Control lanes were loaded with serum (S), siRNA (R), or siRNA in 40% serum (R+S) (right side). The absence of free nucleotide in the PAT-SPN lanes suggests effective protection of siRNA against serum-induced instability.

Submitted to

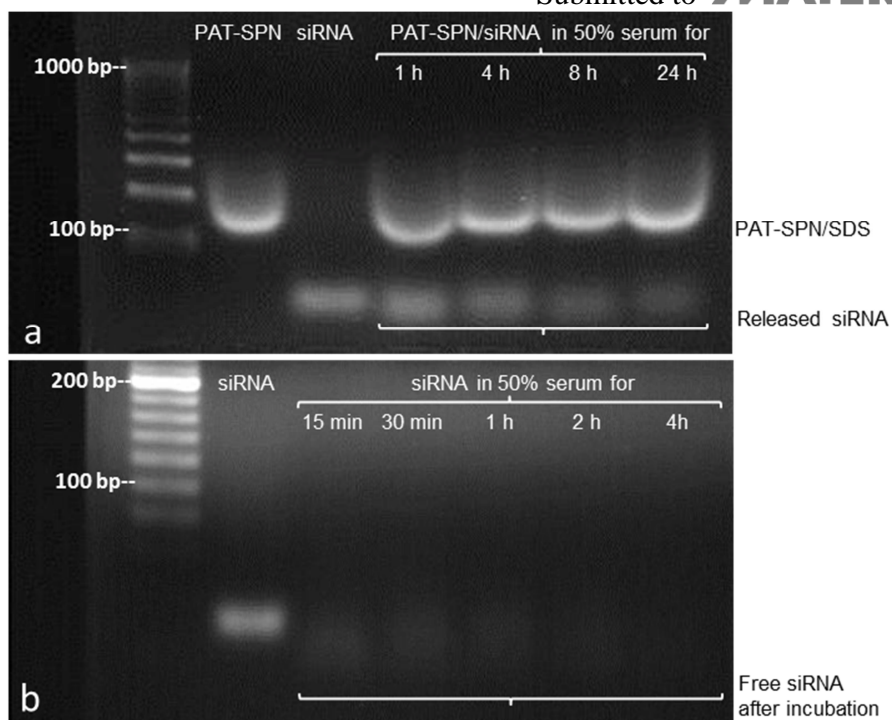

**Figure S12.** PAT-SPNs protect siRNA from (a) degradation, relative to (b) free siRNA in the presence of 50% serum at 37°C. (a) PAT-SPN were loaded with siRNA and incubated in 50% serum at 37°C. At the end of the incubation, siRNA was released from the PAT-SPN by the addition of 1% SDS. From left to right: molecular weight ladder; PAT-SPN alone (no siRNA)+SDS; siRNA alone (no PAT-SPN); PAT-SPN+siRNA incubated for 1 hr, 4 hrs, 8 hrs, 24 hrs, then SDS added. The relative persistence of band intensity for released siRNA suggests effective protection by PAT-SPN from nuclease activity in serum (relative to unprotected siRNA plus serum). (b) From left to right: molecular weight controls; siRNA in the absence of serum; siRNA incubated in 50% serum at 37°C for 0.25 hr, 0.5 hr, 1 hr, 2 hrs, 4hrs. The dimution of band intensity for free siRNA suggests rapid degradation of unprotected siRNA by nucleases in serum.

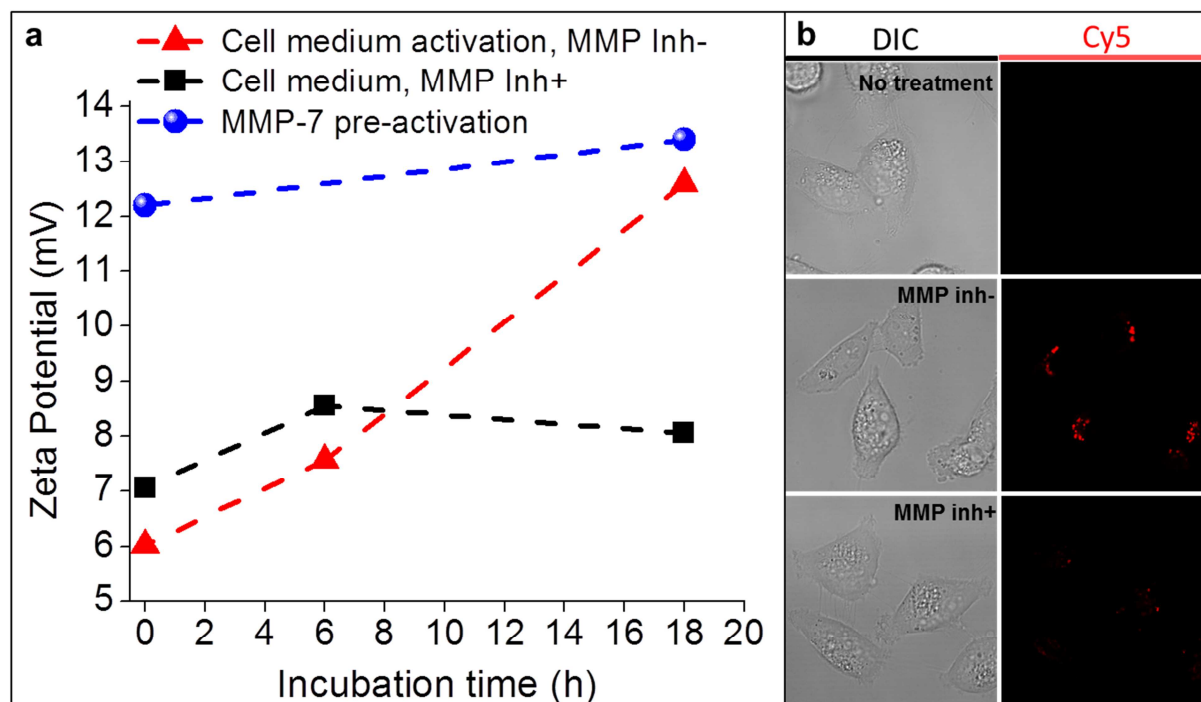

**Figure S13.** Activation of PAT-SPNs by MMPs endogenously produced by MDA-MB-231 breast cancer cells as analyzed by zeta potential measurement and confocal microscopy. **(a)** Following incubation in MDA-MB-231 conditioned media, the  $\zeta$ -potential of PAT-SPN/DNA (N(+)/P(-)=6, 0.5 mg/mL polymer) increased from +6.0 to +12.6 mV (red line) in 18 h and reached values comparable to that induced by treatment with exogenous MMP-7 (blue line). On the contrary, the zeta potential was stable in the conditioned media supplemented with pan-MMP inhibitor (inh+) GM6001 (black line). **(b)** Cellular internalization of PAT-SPN/DNA<sup>Cy5</sup> (N(+)/P(-)=6, 50 nM DNA<sup>Cy5</sup>, 0.02 mg/mL polymer) was reduced in tissue culture upon addition of a broad spectrum MMP inhibitor, suggesting that there is a correlation between local MMP activity and degree of PAT-SPN cellular internalization. Microscope settings were adjusted in each experiment to achieve sufficient contrast in the brightest sample and were thereafter held constant for all other samples imaged.

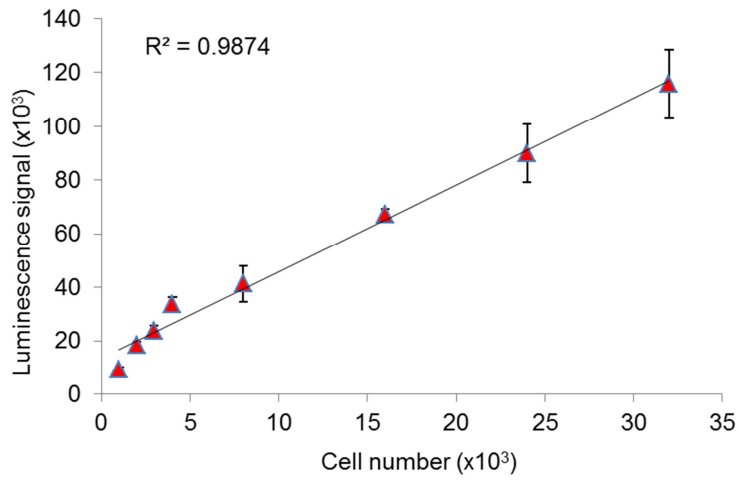

**Figure S14.** Correlation between cell number and luciferase bioluminescence intensity in R221A-luc tumor cells. A positive linear correlation of the R221A-Luc cell number with the luciferase signal was observed.
